# Supplementary material for: Loss of Prdm12 during development, but not in mature nociceptors, causes defects in pain sensation
Source: PubMed Central journal article supplement — Cell Rep. Author manuscript; Available in PMC 2021 Apr 15. (PMC8048104; doi:10.1016/j.celrep.2021.108913), 2021-03-30
Supplement: NIHMS1689236-supplement-1.pdf [file NIHMS1689236-supplement-1.pdf]

Cell Reports, Volume 34

**Supplemental information**

**Loss of *Prdm12* during development,  
but not in mature nociceptors,  
causes defects in pain sensation**

**Mark A. Landy, Megan Goyal, Katherine M. Casey, Chen Liu, and Helen C. Lai**

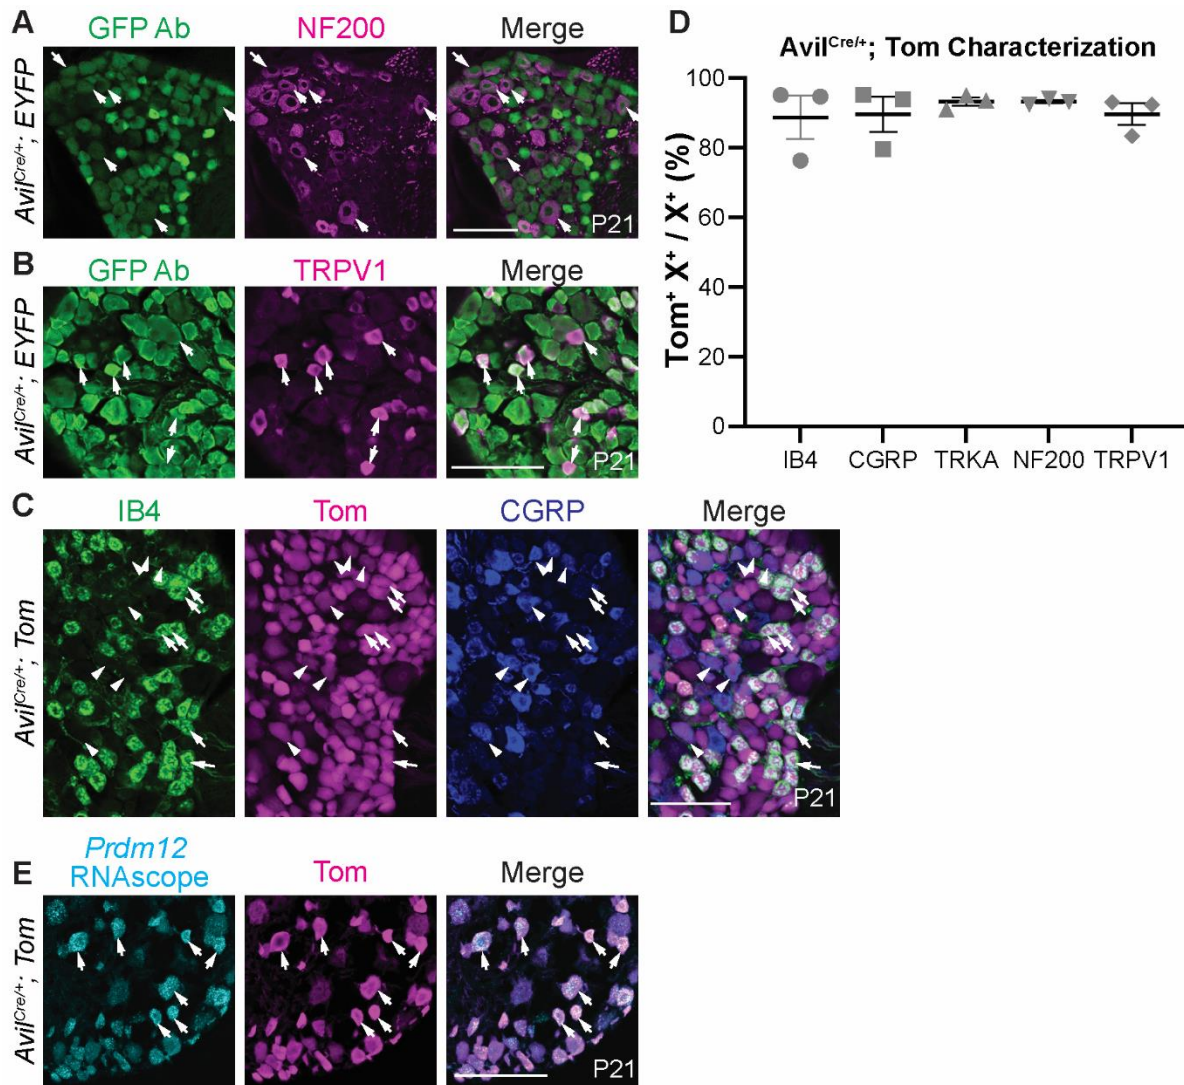

**Supplemental Figure 1. Characterization of a sensory neuron specific CRE line.** Related to Fig. 3. *Avil<sup>Cre/+</sup>* crossed to a CRE-dependent reporter identifies DRG neurons expressing CRE recombinase. (A-C) *Avil<sup>Cre/+</sup>*-lineage neurons colocalize with myelinated DRG neurons (A, NF200<sup>+</sup>, arrows) unmyelinated TRPV1<sup>+</sup> neurons (B, arrows), and nonpeptidergic (C, IB4<sup>+</sup>, arrows) and peptidergic (C, CGRP<sup>+</sup>, arrowheads) C-fibers. (D) Quantification of Tom<sup>+</sup> neurons as a percent of neurons expressing other markers in the *Avil<sup>Cre/+</sup>* lineage. Counts are the average of three L2-5 DRG sections per animal in n=3 mice. (E) The *Avil<sup>Cre/+</sup>*-lineage also colocalizes with *Prdm12* mRNA expression (arrows, RNAscope). Scale bars 100  $\mu$ m.

**Table S3. Sequences for qPCR and genotyping primers, and the *Prdm12* exon V probe.**

Related to the STAR Methods.

| Sequence Type | Name                   | Sequence                   | Reference              |
|---------------|------------------------|----------------------------|------------------------|
| qPCR Primers  | Prdm12 exon 1 F        | TCAAAACAGGGCTGAAGGCT       | Desiderio et al. 2019  |
|               | Prdm12 exon 1 R        | TTGCGCCATCGGCCATATAA       |                        |
|               | Prdm12 exon 5 F        | CTTGGGGAGGGCAATGCTTA       | Desiderio et al. 2019  |
|               | Prdm12 exon 5 R        | TCCAATCACAGCCAAGGGTC       |                        |
|               | Ntrk1 F                | AGAGTGGCCTCCGCTTTGT        | Bartesaghi et al. 2019 |
|               | Ntrk1 R                | CGCATTGGAGGACAGATTCA       |                        |
|               | Calca F                | TTTGAGGTCAATCTTGAAAGCA     | Harvard PrimerBank     |
|               | Calca R                | CTGAGCAGTGACACTAGAGCC      |                        |
|               | Scn10a F               | ACCGACAATCAGAGCGAGGAG      | Laedermann et al. 2014 |
|               | Scn10a R               | ACAGACTAGAAATGGACAGAATCACC |                        |
|               | Mrgprd F               | TTTTCAGTGACATTCCTCGCC      | Harvard PrimerBank     |
|               | Mrgprd R               | GCACATAGACACAGAAGGGAGA     |                        |
|               | Trpv1 F                | CCGGCTTTTTGGGAAGGGT        | Harvard PrimerBank     |
|               | Trpv1 R                | GAGACAGGTAGGTCCATCCAC      |                        |
|               | Trpm3 F                | CAAGATGCCTGCCGTTTTTCT      | Harvard PrimerBank     |
|               | Trpm3 R                | GTCTAATTGGCAACTACCCCAA     |                        |
|               | Trpa1 F                | GTCCAGGGCGTTGTCTATCG       | Harvard PrimerBank     |
|               | Trpa1 R                | CGTGATGCAGAGGACAGAGAT      |                        |
|               | Trpv2 F                | TGCTGAGGTGAACAAAGGAAAG     | Harvard PrimerBank     |
|               | Trpv2 R                | TCAAACCGATTTGGGTCCTGT      |                        |
|               | Trpm8 F                | ACAGACGTGTCCTACAGTGAC      | Harvard PrimerBank     |
|               | Trpm8 R                | GCTCTGGGCATAACCACACTT      |                        |
|               | Sst                    | ACCGGGAACAGGAACTGG         | Harvard PrimerBank     |
|               | Sst                    | TTGCTGGGTTGAGTTGGC         |                        |
|               | Nefh F                 | AGCCTGCACTACTCGCTGA        | Harvard PrimerBank     |
|               | Nefh R                 | GGCCGTTGCTTAGGGTGTC        |                        |
|               | Ntrk2 F                | CTGGGGCTTATGCCTGCTG        | Harvard PrimerBank     |
|               | Ntrk2 R                | AGGCTCAGTACACCAAATCCTA     |                        |
|               | Ntrk3 F                | CTGAGTGCTACAATCTAAGCCC     | Harvard PrimerBank     |
|               | Ntrk3 R                | CACACCCCATAGAACTTGACAAT    |                        |
|               | Pvalb F                | ATCAAGAAGGCGATAGGAGCC      | Harvard PrimerBank     |
|               | Pvalb R                | GGCCAGAAGCGTCTTTGTT        |                        |
| Atf3 F        | AGCTGAGATTCGCCATCCAGAA | Laedermann et al. 2014     |                        |
| Atf3 R        | CTCGCCGCCTCCTTTTCCT    |                            |                        |
| Kcnma1 F      | AAGACGAAGGAGGCCAGAA    | Laumet et al. 2015         |                        |
| Kcnma1 R      | TCAGTGTCTGGGCGGATATC   |                            |                        |
| Hprt F        | GTCCTGTGGCCATCTGCCTAG  |                            |                        |

|                       |                  |                                                                                                                                                                                                                                                                                                                                                                                                                                                                                                                                                                       |                           |
|-----------------------|------------------|-----------------------------------------------------------------------------------------------------------------------------------------------------------------------------------------------------------------------------------------------------------------------------------------------------------------------------------------------------------------------------------------------------------------------------------------------------------------------------------------------------------------------------------------------------------------------|---------------------------|
|                       | Hprt R           | TGGGGACGCAGCAACTGACA                                                                                                                                                                                                                                                                                                                                                                                                                                                                                                                                                  | Harvard<br>PrimerBank     |
| Genotyping<br>Primers | Prdm12dlg        | GGTGCAAGGTCCAAATGTCT                                                                                                                                                                                                                                                                                                                                                                                                                                                                                                                                                  | Chen et al.<br>2020       |
|                       | Prdm12drg/Null R | CACACTGCAGCTGGCTAAAC                                                                                                                                                                                                                                                                                                                                                                                                                                                                                                                                                  |                           |
|                       | Prdm12 Null F    | TTCGGATGAGATGGCTAAGG                                                                                                                                                                                                                                                                                                                                                                                                                                                                                                                                                  |                           |
|                       | Cre F            | GGACATGTTTCAGGGATCGCCAGGCG                                                                                                                                                                                                                                                                                                                                                                                                                                                                                                                                            | This lab                  |
|                       | Cre R            | GCATAACCAGTGAAACAGCATTGCTG                                                                                                                                                                                                                                                                                                                                                                                                                                                                                                                                            |                           |
|                       | iCre F           | AGATGCCAGGACATCAGGAACCTG                                                                                                                                                                                                                                                                                                                                                                                                                                                                                                                                              | The Jackson<br>Laboratory |
|                       | iCre R           | ATCAGCCACACCAGACACAGAGATC                                                                                                                                                                                                                                                                                                                                                                                                                                                                                                                                             |                           |
| ISH Probe             | Prdm Exon V      | GCAGGGCCCGCTCTCCACGCGGACATC<br>TCTGTCCTAGATGACAGGAGAGGGGGAA<br>CAGACGATCTCCAAAGAGAGCTGAGTAG<br>TTGGGAGTGGAAGAGAGAGCTACCTCCT<br>TGGCCCAGAGTGGGCTTGGGGAGGGCA<br>ATGCTTATCTCTGCCTCCTGGGAATGGT<br>GTCTTGATGTGTCACGAGTGGAGGGAA<br>GACGTTGACCCTTGGCTGTGATTGGAGC<br>CCTAAAGTGATTAGCACAGACCGGGAGA<br>GACCTGATCATTTCGGGGGGCCCTGCTTT<br>CCTTCAGGCTACTTTCCCTAGCCTCCAG<br>CTCCCAGGGAAGGACAAGACGACAATAT<br>ATTTTTTGAAGTGTGCTGGGCAGATTGA<br>GAGTGGAGTCACAAGAGACATTTACCAC<br>AGCCCGTGGGCAAGACCCTGACCCTTTT<br>GGGGCTTCAGTTTCCCATCTATAGAAC<br>GCAGTAATTAGATCAGTGCTCCCTCTCC<br>TAAATCTC | This paper                |
